# Supplementary material for: A small gene sequencing panel realises a high diagnostic rate in patients with congenital nystagmus following basic phenotyping
Source: PubMed Central journal article supplement (PMC6744446; doi:10.1038/s41598-019-49368-7), 2019-09-13
Supplement: 41598_2019_49368_MOESM1_ESM.pdf [file 41598_2019_49368_MOESM1_ESM.pdf]

## Supplementary Information

### **A small gene sequencing panel realises a high diagnostic rate in patients with congenital nystagmus following basic phenotyping**

Luke O’Gorman, Chelsea S. Norman, Luke Michaels, Tutte Newall, Andrew H. Crosby, Christopher Mattocks, Angela J. Cree, Andrew J. Lotery, Emma L. Baple, J. Arjuna Ratnayaka, Diana Baralle, Helena Lee, Daniel Osborne, Fatima Shawkat, Jane Gibson, Sarah Ennis<sup>+</sup>, Jay E Self<sup>+</sup>\*

<sup>1</sup>Human Development and Health, Faculty of Medicine, University of Southampton, MP808, Tremona Road, Southampton SO16 6YD, UK

<sup>2</sup>Clinical and Experimental Sciences, Faculty of Medicine, University of Southampton, MP806, Tremona Road, Southampton, SO16 6YD, UK

<sup>3</sup>Eye Unit, University Hospital Southampton NHS Foundation Trust, Tremona Road, Southampton, SO16 6YD, UK

<sup>4</sup>Institute of Biomedical and Clinical Science, University of Exeter Medical School, RILD Wellcome Wolfson Centre, Exeter, EX2 5DW, UK

<sup>5</sup>Wessex Investigational Science Hub, University Hospital Southampton, Tremona Road, Southampton SO16 6YD, UK

<sup>6</sup>Medical Research (Level 4), University of Exeter Medical School, RILD Wellcome Wolfson Centre, Royal Devon and Exeter NHS Foundation Trust, Barrack Road, Exeter, EX2 5DW, UK.

<sup>7</sup>Biological Sciences, Faculty of Natural and Environmental Sciences, University of Southampton, Southampton, SO17 1BJ, UK

<sup>8</sup>Human Genetics & Genomic Medicine, Faculty of Medicine, University of Southampton, MP 808, Tremona Road, Southampton SO16 6YD, UK

\*J.E.Self@soton.ac.uk

<sup>+</sup>Joint last authorship

**Table S1** UKGTN gene panel for 'Nystagnus and albinism'. HGNC approved gene names for genes listed in the UKGTN gene panel for 'Nystagnus and albinism' with the associated OMIM inheritance pattern and phenotype.

| Symbol (HGNC)   | Loci (HGNC)   | Assumed inheritance pattern (OMIM) | Phenotype (OMIM)                              | Median Coding Sequence coverage at 20X depth of the n=81 cohort (RefSeq Curated) |
|-----------------|---------------|------------------------------------|-----------------------------------------------|----------------------------------------------------------------------------------|
| <i>AP3B1</i>    | 5q14.1        | AR                                 | Hermansky-Pudlak syndrome 2                   | 0.992                                                                            |
| <i>BLOC1S3</i>  | 19q13.32      | AR                                 | Hermansky-Pudlak syndrome 8                   | 0.943                                                                            |
| <i>BLOC1S6</i>  | 15q21.1       | AR                                 | Hermansky-Pudlak syndrome 9                   | 0.836                                                                            |
| <i>C10orf11</i> | 10q22.2-q22.3 | AR                                 | Albinism, oculocutaneous, type VII            | 0.705                                                                            |
| <i>CACNA1A</i>  | 19p13.13      | AD                                 | Episodic ataxia, type 2                       | 0.934                                                                            |
| <i>CACNA1F</i>  | Xp11.23       | XL                                 | Aland Island eye disease                      | 0.985                                                                            |
| <i>CASK</i>     | Xp11.4        | XLD                                | FG syndrome 4                                 | 0.980                                                                            |
| <i>DTNBP1</i>   | 6p22.3        | AR                                 | Hermansky-Pudlak syndrome 7                   | 0.993                                                                            |
| <i>FRMD7</i>    | Xq26.2        | XL                                 | Nystagnus 1, congenital, X-linked             | 0.961                                                                            |
| <i>GPR143</i>   | Xp22.2        | XL                                 | Ocular albinism, type I                       | 0.844                                                                            |
| <i>HPS1</i>     | 10q24.2       | AR                                 | Hermansky-Pudlak syndrome 1                   | 0.929                                                                            |
| <i>HPS3</i>     | 3q24          | AR                                 | Hermansky-Pudlak syndrome 3                   | 0.994                                                                            |
| <i>HPS4</i>     | 22q12.1       | AR                                 | Hermansky-Pudlak syndrome 4                   | 0.977                                                                            |
| <i>HPS5</i>     | 11p15.1       | AR                                 | Hermansky-Pudlak syndrome 5                   | 0.975                                                                            |
| <i>HPS6</i>     | 10q24.32      | AR                                 | Hermansky-Pudlak syndrome 6                   | 1.000                                                                            |
| <i>LYST</i>     | 1q42.3        | AR                                 | Chediak-Higashi syndrome                      | 0.969                                                                            |
| <i>MANBA</i>    | 4q24          | AR                                 | Mannosidosis, beta                            | 0.991                                                                            |
| <i>MITF</i>     | 3p13          | AR                                 | Tietz albinism-deafness syndrome              | 0.980                                                                            |
| <i>MLPH</i>     | 2q37.3        | AR                                 | Griscelli syndrome, type 3                    | 0.992                                                                            |
| <i>MYO5A</i>    | 15q21.2       | AR                                 | Griscelli syndrome, type 1                    | 0.987                                                                            |
| <i>OCA2</i>     | 15q12-q13.1   | AR                                 | Albinism, oculocutaneous, type II             | 0.991                                                                            |
| <i>PAX6</i>     | 11p13         | AD                                 | Foveal hypoplasia 1                           | 0.945                                                                            |
| <i>RAB27A</i>   | 15q21.3       | AR                                 | Griscelli syndrome, type 2                    | 0.994                                                                            |
| <i>SACS</i>     | 13q12.12      | AR                                 | Spastic ataxia, Charlevoix-Saguenay type      | 0.999                                                                            |
| <i>SETX</i>     | 9q34.13       | AR                                 | Spinocerebellar ataxia, autosomal recessive 1 | 0.993                                                                            |
| <i>SLC24A5</i>  | 15q21.1       | AR                                 | Albinism, oculocutaneous, type VI             | 0.995                                                                            |
| <i>SLC45A2</i>  | 5p13.2        | -                                  | Albinism, oculocutaneous, type IV             | 0.939                                                                            |
| <i>TULP1</i>    | 6p21.31       | AR                                 | Leber congenital amaurosis 15                 | 0.981                                                                            |
| <i>TYR</i>      | 11q14.3       | AR                                 | Albinism, oculocutaneous, type I              | 0.960                                                                            |
| <i>TYROBP</i>   | 19q13.12      | AR                                 | Nasu-Hakola disease                           | 0.988                                                                            |
| <i>TYRP1</i>    | 9p23          | AR                                 | Albinism, oculocutaneous, type III            | 0.954                                                                            |

**Table S2**      *Overall coverage and contamination metrics of 81 samples.*

| No. samples | Mean depth (X) | Mean coverage at 20x (%) | Min coverage at 20x (%) | Max coverage at 20x (%) | Mean hets (%) | Min hets (%) | Max hets (%) |
|-------------|----------------|--------------------------|-------------------------|-------------------------|---------------|--------------|--------------|
| 81          | 127            | 95.8                     | 90.6                    | 0.987                   | 65.2          | 57.4         | 72.2         |
